# Supplementary material
Source: publisher figshare collection journal article supplement (https://rs.figshare.com/ndownloader/files/11031650)
Supplement: Supplementary file 1 [file 11031650]

## Sheet: sjt_corr
	Al2O3	Ba	bathymetry	broad BPI	fine BPI	CaO	Co	bed shear stress	Cr	Cu	distance coast	distance glacier	Fe2O3	hard substrate	K2O	MgO	MnO	Na2O	Ni	P2O5	Pb	Rb	SPM remote sensing	clay content	mud content	sand content	silt content	SiO2	slope	SPM empirical	Sr mean	Sr	TiO2	TOC mean	TOC max	TS	V	bottom velocity max	bottom velocity mean	Y	Zn	Zr
Al2O3		0.676	-0.365	-0.225	0.002	0.208	0.116	-0.423	0.378	0.148	0.308	0.023	0.666	-0.297	-0.127	0.121	0.751	0.122	-0.047	-0.629	-0.092	-0.171	0.206	0.159	0.12	-0.12	0.093	-0.751	0.227	0.302	0.071	0.02	0.248	-0.18	-0.421	-0.948	0.924	-0.171	-0.281	-0.224	0.558	-0.373
Ba	0.676		-0.34	0.028	-0.029	0.74	-0.429	0.064	0.746	-0.453	0.405	0.524	0.103	-0.051	-0.536	-0.46	0.381	0.609	0.123	-0.836	-0.559	-0.64	-0.162	-0.296	-0.305	0.305	-0.294	-0.369	0.028	-0.251	0.603	-0.281	-0.398	0.28	-0.465	-0.647	0.631	0.171	-0.176	-0.509	0.162	-0.712
bathymetry	-0.365	-0.34		0.87	0.187	-0.217	0.427	0.451	-0.45	0.256	-0.79	-0.53	-0.05	0.614	0.242	-0.002	-0.367	-0.072	-0.228	0.336	0.047	0.355	0.347	-0.075	-0.148	0.148	-0.178	-0.021	-0.144	0.325	-0.475	-0.476	0.154	-0.132	-0.058	0.396	-0.373	-0.242	0.155	0.595	-0.503	0.457
broad BPI	-0.225	0.028	0.87		0.221	0.231	0.077	0.563	-0.064	-0.112	-0.576	-0.147	-0.225	0.737	-0.137	-0.383	-0.319	0.312	-0.147	-0.047	-0.284	-0.059	0.165	-0.393	-0.462	0.462	-0.475	0.067	-0.168	0.097	-0.057	-0.601	-0.188	0.055	-0.278	0.241	-0.245	-0.07	0.123	0.255	-0.613	0.074
fine BPI	0.002	-0.029	0.187	0.221		-0.023	0.048	-0.014	-0.034	0.05	-0.048	-0.057	0.022	0.14	0.02	0.008	0.001	-0.032	-0.032	0.008	0.027	0.034	0.013	-0.024	-0.02	0.02	-0.016	-0.01	0.046	0.04	-0.041	-0.004	0.04	-0.039	-0.012	0.012	0.001	0.005	0.015	0.048	-0.015	0.038
CaO	0.208	0.74	-0.217	0.231	-0.023		-0.728	0.357	0.782	-0.792	0.28	0.747	-0.418	0.301	-0.844	-0.869	0.04	0.817	0.107	-0.803	-0.766	-0.89	-0.339	-0.748	-0.726	0.726	-0.676	0.163	-0.14	-0.443	0.86	-0.261	-0.7	0.43	-0.455	-0.224	0.207	0.347	-0.087	-0.569	-0.307	-0.774
Co	0.116	-0.429	0.427	0.077	0.048	-0.728		-0.166	-0.675	0.923	-0.54	-0.886	0.716	-0.01	0.763	0.776	0.33	-0.75	-0.177	0.383	0.663	0.845	0.592	0.619	0.515	-0.515	0.433	-0.419	0.152	0.682	-0.895	-0.057	0.863	-0.766	-0.131	-0.074	0.13	-0.465	0.025	0.554	0.233	0.766
bed shear stress	-0.423	0.064	0.451	0.563	-0.014	0.357	-0.166		0.033	-0.325	-0.433	0.107	-0.474	0.567	-0.156	-0.451	-0.399	0.303	-0.014	-0.012	-0.324	-0.142	-0.1	-0.387	-0.451	0.451	-0.461	0.365	-0.393	-0.207	0.165	-0.499	-0.374	0.107	-0.24	0.383	-0.446	0.144	0.13	0.007	-0.601	0.036
Cr	0.378	0.746	-0.45	-0.064	-0.034	0.782	-0.675	0.033		-0.707	0.552	0.822	-0.202	-0.069	-0.79	-0.581	0.191	0.733	0.321	-0.789	-0.748	-0.836	-0.44	-0.513	-0.492	0.492	-0.455	0.031	0.017	-0.53	0.85	0.091	-0.645	0.504	-0.191	-0.39	0.436	0.247	-0.183	-0.512	0.092	-0.882
Cu	0.148	-0.453	0.256	-0.112	0.05	-0.792	0.923	-0.325	-0.707		-0.371	-0.889	0.741	-0.174	0.831	0.858	0.38	-0.851	-0.145	0.447	0.794	0.882	0.618	0.72	0.686	-0.686	0.632	-0.433	0.186	0.67	-0.91	0.047	0.941	-0.749	0.002	-0.104	0.151	-0.416	-0.008	0.5	0.402	0.781
coast distance	0.308	0.405	-0.79	-0.576	-0.048	0.28	-0.54	-0.433	0.552	-0.371		0.616	-0.031	-0.571	-0.373	-0.109	0.235	0.304	0.228	-0.349	-0.266	-0.494	-0.362	0.021	0.115	-0.115	0.16	0.004	0.124	-0.434	0.551	0.284	-0.359	0.415	0.149	-0.314	0.356	0.318	-0.069	-0.607	0.419	-0.598
glacier distance	0.023	0.524	-0.53	-0.147	-0.057	0.747	-0.886	0.107	0.822	-0.889	0.616		-0.515	-0.053	-0.834	-0.66	-0.07	0.766	0.235	-0.569	-0.733	-0.881	-0.679	-0.62	-0.575	0.575	-0.521	0.371	-0.082	-0.723	0.963	0.214	-0.848	0.649	0.016	-0.07	0.101	0.432	-0.08	-0.643	-0.053	-0.881
Fe2O3	0.666	0.103	-0.05	-0.225	0.022	-0.418	0.716	-0.474	-0.202	0.741	-0.031	-0.515		-0.348	0.391	0.713	0.793	-0.436	-0.087	-0.11	0.41	0.443	0.474	0.553	0.466	-0.466	0.395	-0.723	0.285	0.575	-0.548	0.102	0.756	-0.577	-0.27	-0.636	0.733	-0.374	-0.154	0.223	0.685	0.227
hard substrate	-0.297	-0.051	0.614	0.737	0.14	0.301	-0.01	0.567	-0.069	-0.174	-0.571	-0.053	-0.348		-0.179	-0.444	-0.283	0.229	-0.159	-0.084	-0.208	-0.102	0.083	-0.49	-0.538	0.538	-0.535	0.253	-0.209	0.068	0.053	-0.411	-0.18	-0.075	-0.351	0.277	-0.331	0.041	0.076	0.118	-0.623	0.088
K2O	-0.127	-0.536	0.242	-0.137	0.02	-0.844	0.763	-0.156	-0.79	0.831	-0.373	-0.834	0.391	-0.179		0.781	-0.014	-0.899	-0.091	0.703	0.86	0.958	0.434	0.798	0.781	-0.781	0.732	-0.207	0.106	0.443	-0.865	-0.054	0.735	-0.604	0.215	0.16	-0.228	-0.352	0.098	0.444	0.164	0.904
MgO	0.121	-0.46	-0.002	-0.383	0.008	-0.869	0.776	-0.451	-0.581	0.858	-0.109	-0.66	0.713	-0.444	0.781		0.375	-0.8	-0.055	0.505	0.741	0.809	0.38	0.808	0.758	-0.758	0.692	-0.36	0.213	0.48	-0.779	0.321	0.799	-0.555	0.264	-0.12	0.185	-0.368	-0.043	0.405	0.612	0.619
MnO	0.751	0.381	-0.367	-0.319	0.001	0.04	0.33	-0.399	0.191	0.38	0.235	-0.07	0.793	-0.283	-0.014	0.375		-0.153	-0.05	-0.516	0.118	0.023	0.314	0.208	0.139	-0.139	0.095	-0.498	0.26	0.397	-0.065	0.242	0.495	-0.489	-0.442	-0.756	0.846	-0.112	-0.212	-0.156	0.71	-0.149
Na2O	0.122	0.609	-0.072	0.312	-0.032	0.817	-0.75	0.303	0.733	-0.851	0.304	0.766	-0.436	0.229	-0.899	-0.8	-0.153		0.024	-0.61	-0.893	-0.898	-0.412	-0.718	-0.73	0.73	-0.698	0.1	-0.186	-0.437	0.795	-0.24	-0.826	0.706	-0.218	-0.144	0.147	0.268	-0.096	-0.434	-0.289	-0.865
Ni	-0.047	0.123	-0.228	-0.147	-0.032	0.107	-0.177	-0.014	0.321	-0.145	0.228	0.235	-0.087	-0.159	-0.091	-0.055	-0.05	0.024		-0.095	-0.07	-0.123	-0.292	-0.018	0.017	-0.017	0.034	0.14	0.102	-0.425	0.218	0.092	-0.186	0.091	0.063	0.003	0.012	0.108	0.088	-0.099	0.033	-0.123
P2O5	-0.629	-0.836	0.336	-0.047	0.008	-0.803	0.383	-0.012	-0.789	0.447	-0.349	-0.569	-0.11	-0.084	0.703	0.505	-0.516	-0.61	-0.095		0.599	0.717	0.136	0.471	0.489	-0.489	0.473	0.215	-0.065	0.14	-0.665	0.076	0.328	-0.123	0.598	0.622	-0.678	-0.16	0.214	0.494	-0.132	0.74
Pb	-0.092	-0.559	0.047	-0.284	0.027	-0.766	0.663	-0.324	-0.748	0.794	-0.266	-0.733	0.41	-0.208	0.86	0.741	0.118	-0.893	-0.07	0.599		0.843	0.446	0.686	0.713	-0.713	0.69	-0.15	0.148	0.442	-0.788	0.072	0.774	-0.652	0.114	0.091	-0.135	-0.287	0.045	0.27	0.223	0.817
Rb	-0.171	-0.64	0.355	-0.059	0.034	-0.89	0.845	-0.142	-0.836	0.882	-0.494	-0.881	0.443	-0.102	0.958	0.809	0.023	-0.898	-0.123	0.717	0.843		0.482	0.734	0.698	-0.698	0.642	-0.19	0.103	0.532	-0.922	0.018	0.799	-0.659	0.196	0.195	-0.22	-0.383	0.13	0.547	0.158	0.93
SPM remote sensing	0.206	-0.162	0.347	0.165	0.013	-0.339	0.592	-0.1	-0.44	0.618	-0.362	-0.679	0.474	0.083	0.434	0.38	0.314	-0.412	-0.292	0.136	0.446	0.482		0.357	0.351	-0.351	0.329	-0.396	0.048	0.775	-0.616	-0.261	0.673	-0.468	-0.218	-0.168	0.169	-0.275	-0.018	0.364	0.156	0.486
clay content	0.159	-0.296	-0.075	-0.393	-0.024	-0.748	0.619	-0.387	-0.513	0.72	0.021	-0.62	0.553	-0.49	0.798	0.808	0.208	-0.718	-0.018	0.471	0.686	0.734	0.357		0.935	-0.935	0.851	-0.377	0.167	0.361	-0.695	0.056	0.655	-0.415	0.237	-0.134	0.102	-0.313	0.046	0.291	0.45	0.592
mud content	0.12	-0.305	-0.148	-0.462	-0.02	-0.726	0.515	-0.451	-0.492	0.686	0.115	-0.575	0.466	-0.538	0.781	0.758	0.139	-0.73	0.017	0.489	0.713	0.698	0.351	0.935		-1	0.982	-0.353	0.185	0.295	-0.649	0.103	0.618	-0.336	0.336	-0.073	0.054	-0.259	0.062	0.244	0.455	0.568
sand content	-0.12	0.305	0.148	0.462	0.02	0.726	-0.515	0.451	0.492	-0.686	-0.115	0.575	-0.466	0.538	-0.781	-0.758	-0.139	0.73	-0.017	-0.489	-0.713	-0.698	-0.351	-0.935	-1		-0.982	0.353	-0.185	-0.295	0.649	-0.103	-0.618	0.336	-0.336	0.073	-0.054	0.259	-0.062	-0.244	-0.455	-0.568
silt content	0.093	-0.294	-0.178	-0.475	-0.016	-0.676	0.433	-0.461	-0.455	0.632	0.16	-0.521	0.395	-0.535	0.732	0.692	0.095	-0.698	0.034	0.473	0.69	0.642	0.329	0.851	0.982	-0.982		-0.322	0.185	0.244	-0.59	0.123	0.566	-0.277	0.371	-0.037	0.027	-0.216	0.067	0.207	0.433	0.526
SiO2	-0.751	-0.369	-0.021	0.067	-0.01	0.163	-0.419	0.365	0.031	-0.433	0.004	0.371	-0.723	0.253	-0.207	-0.36	-0.498	0.1	0.14	0.215	-0.15	-0.19	-0.396	-0.377	-0.353	0.353	-0.322		-0.181	-0.441	0.355	0.146	-0.433	0.214	0.221	0.673	-0.68	0.313	0.183	-0.109	-0.446	0.009
slope	0.227	0.028	-0.144	-0.168	0.046	-0.14	0.152	-0.393	0.017	0.186	0.124	-0.082	0.285	-0.209	0.106	0.213	0.26	-0.186	0.102	-0.065	0.148	0.103	0.048	0.167	0.185	-0.185	0.185	-0.181		0.1	-0.084	0.198	0.227	-0.166	0.017	-0.216	0.242	-0.013	0.105	0.06	0.279	0.03
SPM empirical	0.302	-0.251	0.325	0.097	0.04	-0.443	0.682	-0.207	-0.53	0.67	-0.434	-0.723	0.575	0.068	0.443	0.48	0.397	-0.437	-0.425	0.14	0.442	0.532	0.775	0.361	0.295	-0.295	0.244	-0.441	0.1		-0.66	-0.068	0.777	-0.574	-0.232	-0.273	0.25	-0.349	-0.079	0.46	0.243	0.486
Sr mean	0.071	0.603	-0.475	-0.057	-0.041	0.86	-0.895	0.165	0.85	-0.91	0.551	0.963	-0.548	0.053	-0.865	-0.779	-0.065	0.795	0.218	-0.665	-0.788	-0.922	-0.616	-0.695	-0.649	0.649	-0.59	0.355	-0.084	-0.66		0.105	-0.844	0.609	-0.104	-0.099	0.108	0.458	-0.058	-0.637	-0.151	-0.874
Sr max	0.02	-0.281	-0.476	-0.601	-0.004	-0.261	-0.057	-0.499	0.091	0.047	0.284	0.214	0.102	-0.411	-0.054	0.321	0.242	-0.24	0.092	0.076	0.072	0.018	-0.261	0.056	0.103	-0.103	0.123	0.146	0.198	-0.068	0.105		0.139	-0.025	0.49	-0.041	0.142	0.054	-0.058	0.069	0.539	-0.135
TiO2	0.248	-0.398	0.154	-0.188	0.04	-0.7	0.863	-0.374	-0.645	0.941	-0.359	-0.848	0.756	-0.18	0.735	0.799	0.495	-0.826	-0.186	0.328	0.774	0.799	0.673	0.655	0.618	-0.618	0.566	-0.433	0.227	0.777	-0.844	0.139		-0.784	-0.085	-0.229	0.25	-0.393	-0.026	0.498	0.458	0.715
TOC mean	-0.18	0.28	-0.132	0.055	-0.039	0.43	-0.766	0.107	0.504	-0.749	0.415	0.649	-0.577	-0.075	-0.604	-0.555	-0.489	0.706	0.091	-0.123	-0.652	-0.659	-0.468	-0.415	-0.336	0.336	-0.277	0.214	-0.166	-0.574	0.609	-0.025	-0.784		0.451	0.214	-0.154	0.316	-0.015	-0.2	-0.174	-0.651
TOC max	-0.421	-0.465	-0.058	-0.278	-0.012	-0.455	-0.131	-0.24	-0.191	0.002	0.149	0.016	-0.27	-0.351	0.215	0.264	-0.442	-0.218	0.063	0.598	0.114	0.196	-0.218	0.237	0.336	-0.336	0.371	0.221	0.017	-0.232	-0.104	0.49	-0.085	0.451		0.481	-0.403	0.078	0.121	0.289	0.161	0.112
TS	-0.948	-0.647	0.396	0.241	0.012	-0.224	-0.074	0.383	-0.39	-0.104	-0.314	-0.07	-0.636	0.277	0.16	-0.12	-0.756	-0.144	0.003	0.622	0.091	0.195	-0.168	-0.134	-0.073	0.073	-0.037	0.673	-0.216	-0.273	-0.099	-0.041	-0.229	0.214	0.481		-0.903	0.17	0.316	0.254	-0.559	0.379
V	0.924	0.631	-0.373	-0.245	0.001	0.207	0.13	-0.446	0.436	0.151	0.356	0.101	0.733	-0.331	-0.228	0.185	0.846	0.147	0.012	-0.678	-0.135	-0.22	0.169	0.102	0.054	-0.054	0.027	-0.68	0.242	0.25	0.108	0.142	0.25	-0.154	-0.403	-0.903		-0.133	-0.286	-0.206	0.663	-0.433
bottom velocity max	-0.171	0.171	-0.242	-0.07	0.005	0.347	-0.465	0.144	0.247	-0.416	0.318	0.432	-0.374	0.041	-0.352	-0.368	-0.112	0.268	0.108	-0.16	-0.287	-0.383	-0.275	-0.313	-0.259	0.259	-0.216	0.313	-0.013	-0.349	0.458	0.054	-0.393	0.316	0.078	0.17	-0.133		0.545	-0.342	-0.099	-0.313
bottom velocity mean	-0.281	-0.176	0.155	0.123	0.015	-0.087	0.025	0.13	-0.183	-0.008	-0.069	-0.08	-0.154	0.076	0.098	-0.043	-0.212	-0.096	0.088	0.214	0.045	0.13	-0.018	0.046	0.062	-0.062	0.067	0.183	0.105	-0.079	-0.058	-0.058	-0.026	-0.015	0.121	0.316	-0.286	0.545		0.063	-0.236	0.18
Y	-0.224	-0.509	0.595	0.255	0.048	-0.569	0.554	0.007	-0.512	0.5	-0.607	-0.643	0.223	0.118	0.444	0.405	-0.156	-0.434	-0.099	0.494	0.27	0.547	0.364	0.291	0.244	-0.244	0.207	-0.109	0.06	0.46	-0.637	0.069	0.498	-0.2	0.289	0.254	-0.206	-0.342	0.063		0.03	0.547
Zn	0.558	0.162	-0.503	-0.613	-0.015	-0.307	0.233	-0.601	0.092	0.402	0.419	-0.053	0.685	-0.623	0.164	0.612	0.71	-0.289	0.033	-0.132	0.223	0.158	0.156	0.45	0.455	-0.455	0.433	-0.446	0.279	0.243	-0.151	0.539	0.458	-0.174	0.161	-0.559	0.663	-0.099	-0.236	0.03		-0.1
Zr	-0.373	-0.712	0.457	0.074	0.038	-0.774	0.766	0.036	-0.882	0.781	-0.598	-0.881	0.227	0.088	0.904	0.619	-0.149	-0.865	-0.123	0.74	0.817	0.93	0.486	0.592	0.568	-0.568	0.526	0.009	0.03	0.486	-0.874	-0.135	0.715	-0.651	0.112	0.379	-0.433	-0.313	0.18	0.547	-0.1
Computed correlation used pearson-method with pairwise-deletion. Non-significant correlation-values appear faded (by using a lighter grey text color)
